# Supplementary material for: The relationship between disease activity and quality of life in rheumatoid arthritis patients: a network analysis
Source: PeerJ journal article supplement (doi:10.7717/peerj.19907), 2025-08-21

a

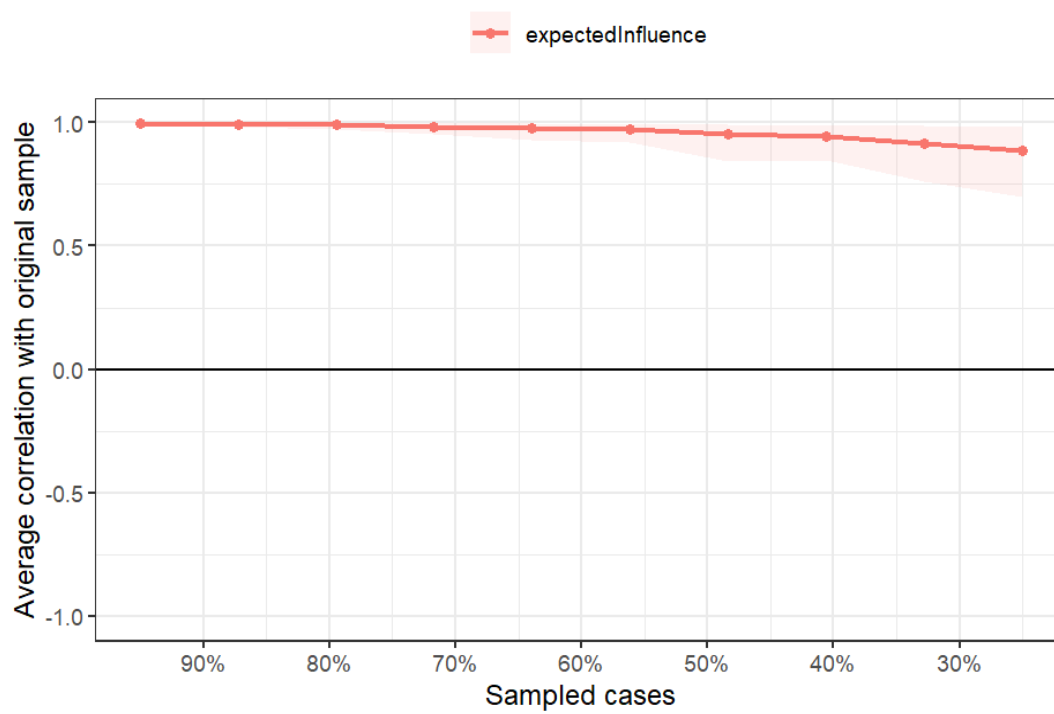

b

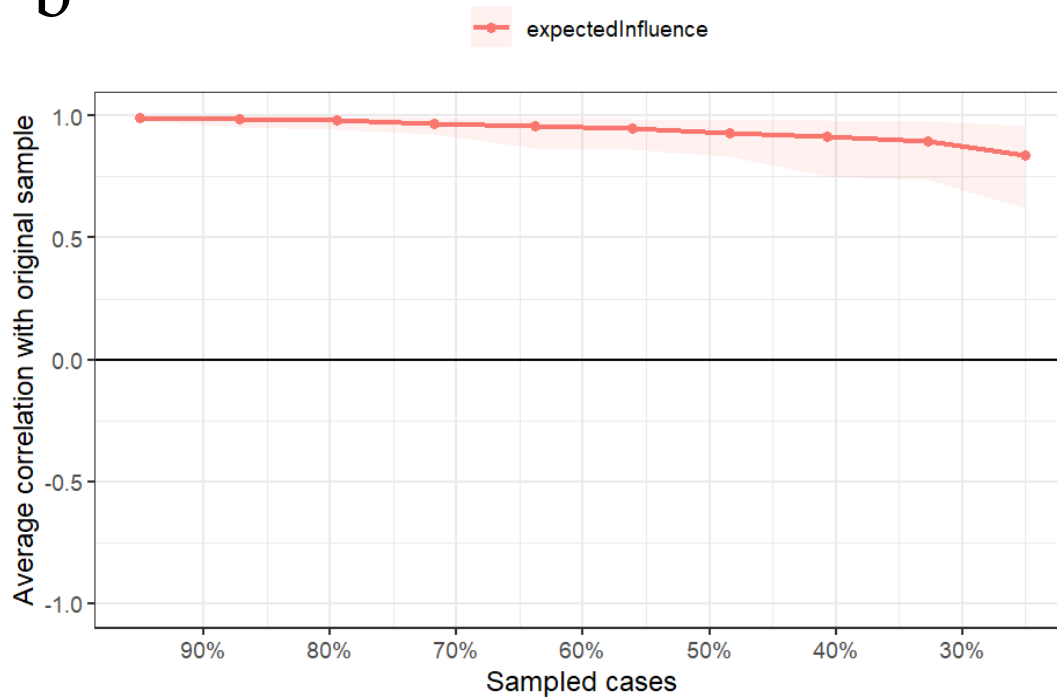

Supplement: Figure_S2.pdf [file Figure_S2.pdf]
