# Supplementary material for: The relationship between disease activity and quality of life in rheumatoid arthritis patients: a network analysis
Source: PeerJ. 2025 Aug 21;13:e19907. doi: 10.7717/peerj.19907 (PMC12375295; doi:10.7717/peerj.19907)
Supplement: Supplemental Information 5 [file peerj-13-19907-s005.xlsx]

## Sheet: Raw data file 1
Gender(1:male 2:female)	Age(years)	Height(cm)	Weight(kg)	BMI(kg/m2)	Family location(1:rural;2:urban)	Marital status(1:unmarried;2:married; 3:divorced; 4:widowed)	Education level(1:illiterate; 2:elementary school; 3:junior high school; 4:high school; 5:university)	Smoking(1:yes;2:no)	Alcohol consumption(1:yes;2:no)	Disease duration(years)	Number of chronic diseases	Sleep duration(hours)	Joint VAS score(mm)	Swollen joint count	Tender joint count	ESR(mm/h)	PF	RP	BP	GH	VT	SF	RE	MH	DAS28	HADS	Depressive symptoms (1:without depressive symptoms;2:with depressive symptoms)
2	55	150	35	15.5556	1	2	1	2	2	2	2	5	50	8	14	101	70	0	61	47	70	60	100	76	6.81787	4	1
1	57	168	62.5	22.1443	2	2	4	1	1	0	1	8	80	4	28	20	45	0	72	45	80	60	100	84	6.74025	6	1
2	49	160	58	22.6562	1	2	2	2	2	10	1	4	40	10	10	56	45	0	72	40	75	70	100	88	6.03406	4	1
2	82	153	63	26.9127	2	2	3	2	2	20	1	8	10	0	1	34	75	25	62	72	90	70	100	96	3.16845	1	1
2	56	155	60	24.974	2	2	1	2	2	0	1	5	50	15	4	28	40	50	94	62	75	70	66.6667	72	5.23698	3	1
1	57	168	45	15.9439	1	2	2	1	1	0	1	6	30	2	4	67	75	25	84	57	85	70	100	88	4.87926	3	1
1	54	174	56	18.4965	1	2	2	1	2	1	1	8	20	2	12	78	60	75	94	47	90	50	66.6667	88	5.66557	1	1
1	68	168	65	23.03	2	2	2	1	2	10	2	6	80	0	28	9	35	0	84	57	95	60	100	96	5.6213	1	1
1	66	150	50	22.2222	1	2	2	2	2	1	1	9	20	1	3	28	60	0	72	45	80	80	100	84	3.86249	7	1
2	61	158	80	32.0461	1	2	3	2	2	10	2	5	25	2	4	8	55	50	82	55	70	70	33.3333	84	3.32159	3	1
2	53	165	50	18.3655	2	2	1	2	2	3	1	7	50	12	2	48	80	0	62	35	70	80	100	84	5.17175	7	1
1	72	165	60	22.0386	1	2	2	2	2	1	2	7	15	0	2	89	95	50	74	67	85	90	100	80	4.14401	1	1
2	57	155	61	25.3902	1	2	2	2	2	8	1	8	40	8	6	67	25	0	94	35	70	40	100	72	5.66696	7	1
2	51	156	55	22.6003	2	2	3	2	2	25	2	9	60	12	12	31	60	0	84	50	55	60	100	60	6.15364	6	1
2	55	160	52	20.3125	2	2	4	1	2	7	2	3	5	1	1	7	35	0	72	55	85	60	100	88	2.27214	6	1
2	47	178	60	18.937	1	2	1	2	2	10	1	2	20	4	4	57	35	0	61	45	75	80	0	76	4.79014	7	1
2	60	160	56	21.875	2	2	1	2	2	10	1	4	15	1	4	25	40	0	72	62	70	80	0	84	3.86321	5	1
2	69	154	52	21.9261	1	2	1	1	2	4	1	9	5	12	1	82	25	0	72	35	80	80	0	84	4.68465	7	1
2	50	158	60	24.0346	2	2	3	2	2	15	1	8	10	1	1	14	85	0	74	57	75	80	100	88	2.82734	7	1
2	50	165	57	20.9366	2	2	4	2	2	20	1	6	35	6	16	40	95	100	74	42	70	70	100	80	5.99807	2	1
1	65	176	74	23.8895	2	2	4	2	2	14	1	6	10	0	0	21.4	95	100	74	82	80	90	100	88	2.28437	1	1
2	61	165	60	22.0386	1	2	2	2	2	1	2	6	15	1	2	80	80	50	84	35	80	60	33.3333	56	4.34938	4	1
2	61	165	63	23.1405	1	2	2	1	2	9	1	9	10	2	2	32	90	0	62	67	85	80	100	92	3.75395	7	1
2	48	159	55	21.7555	1	2	1	2	2	20	1	8	15	1	4	120	55	0	72	60	80	90	100	92	4.96124	3	1
2	34	165	70	25.7117	2	2	3	2	2	8	0	9	20	0	2	29	95	100	74	35	65	50	0	64	3.42907	5	1
2	36	160	54	21.0938	2	2	3	2	2	3	0	10	5	0	0	7	95	100	74	82	90	80	100	84	1.43214	1	1
2	24	153	44.5	19.0098	2	2	4	2	2	2	0	10	15	2	4	115	95	100	74	57	70	60	100	68	5.04743	6	1
2	60	160	45	17.5781	2	2	4	2	2	12	0	8	30	10	13	112	95	100	74	62	65	70	100	84	6.6275	2	1
2	58	150	46	20.4444	1	2	1	2	2	1	0	6	40	2	14	56	80	50	84	30	55	60	33.3333	64	5.86905	4	1
1	57	178	70	22.0932	2	2	2	1	1	10	1	5	30	2	12	8	95	50	74	67	65	80	100	72	4.21149	3	1
2	80	158	50	20.0288	2	2	2	2	1	2	1	8	50	10	2	157	5	0	82	35	50	50	33.3333	60	5.91677	5	1
1	47	175	96	31.3469	2	2	3	1	2	1	0	7	20	2	7	98	85	100	82	60	80	90	100	88	5.36708	1	1
2	53	162	50	19.052	2	2	4	2	2	1	0	6	25	2	8	27	75	50	84	67	75	90	100	88	4.63698	2	1
2	53	160	63	24.6094	1	2	2	2	2	1	0	5	15	0	5	16	90	25	62	50	65	60	66.6667	80	3.40301	2	1
2	37	156	62.7	25.7643	2	2	3	2	2	1	0	8	10	0	5	15	50	0	72	55	60	70	66.6667	76	3.28783	2	1
2	88	167	60	21.5139	1	2	2	2	2	1	2	6	25	1	6	41	75	50	84	72	85	80	100	88	4.60121	2	1
2	69	153	45	19.2234	1	2	2	1	2	20	2	9	70	12	28	55	0	0	71	35	70	80	0	88	7.71832	4	1
2	54	160	55	21.4844	1	2	2	2	2	1	2	9	20	4	8	73	85	100	84	35	60	60	100	72	5.42724	2	1
1	64	160	55	21.4844	1	2	3	2	2	10	0	6	15	1	6	94	0	0	94	45	90	90	0	96	5.04202	3	1
2	48	160	51.5	20.1172	1	2	3	2	2	20	0	7	20	4	2	23	75	75	84	57	65	70	66.6667	68	3.82681	2	1
2	59	160	55	21.4844	1	2	2	2	2	10	0	8	15	2	4	13	80	75	84	57	70	60	66.6667	60	3.52144	1	1
1	48	176	65	20.984	1	2	2	1	2	1	0	7	55	4	10	14	85	50	84	45	60	70	66.6667	64	4.94822	4	1
2	57	158	52	20.83	2	2	2	2	2	10	0	5	30	2	6	121	65	25	72	45	50	50	33.3333	60	5.54475	6	1
2	56	153	39	16.6603	1	2	2	2	2	20	0	5	35	8	6	99	85	75	72	57	60	60	33.3333	52	5.87026	7	1
2	53	148	50	22.8269	1	2	2	2	2	13	0	6	25	2	6	31	25	0	94	35	45	40	0	48	4.52149	7	1
2	75	154	40	16.8663	1	2	2	2	2	30	2	7	30	4	6	5	5	0	71	30	70	60	0	56	3.47832	7	1
1	66	175	66	21.551	2	2	4	2	2	17	1	5	5	1	0	7	85	75	84	72	80	90	100	88	1.71214	1	1
2	72	150	30	13.3333	1	2	1	2	2	30	0	7	15	0	4	110	5	0	82	30	40	40	0	48	4.62034	7	1
2	70	150	49	21.7778	1	2	1	2	2	15	0	5	85	11	24	29	35	0	72	45	65	80	0	84	7.21919	3	1
1	57	168	45	15.9439	1	2	2	2	2	1	1	6	15	4	3	44	75	50	72	35	65	50	0	60	4.38888	7	1
2	50	167	50	17.9282	1	2	3	2	2	1	0	8	30	7	3	125	90	100	51	30	60	40	0	60	5.51058	2	1
2	20	163	46	17.3134	2	1	5	2	2	1	0	10	40	7	3	91	85	75	84	35	65	50	0	52	5.42836	5	1
2	60	145	30	14.2687	1	2	2	2	2	30	1	7	65	2	0	35	10	0	94	20	70	30	33.3333	60	3.79472	7	1
2	48	160	67	26.1719	2	2	3	2	2	11	0	6	10	2	0	11	80	50	72	72	70	50	33.3333	64	2.21451	3	1
2	28	183	57	17.0205	2	2	5	2	2	3	0	9	15	2	1	29	95	100	74	62	85	80	100	84	3.52309	3	1
2	55	163	73.5	27.6638	1	2	3	2	2	2	1	8	15	1	0	21	85	75	74	62	75	80	66.6667	80	2.62117	2	1
2	56	160	65	25.3906	1	2	2	2	2	20	1	7	35	8	8	57	85	25	72	45	55	60	33.3333	56	5.69601	7	1
2	51	174	65	21.4692	2	2	4	2	2	7	0	8	15	1	2	3	95	100	74	67	85	80	100	84	2.05099	3	1
2	68	150	36	16	1	2	1	2	2	6	0	7	25	0	3	132	70	50	72	62	75	80	100	72	4.73791	2	1
2	57	155	50	20.8117	1	4	3	2	2	20	0	6	10	2	0	51	85	100	84	60	70	60	33.3333	84	3.28826	4	1
2	81	155	44	18.3143	1	4	1	2	2	9	0	4	65	2	2	108	40	0	84	55	85	80	100	88	5.37543	1	1
1	60	170	70	24.2215	2	2	3	2	2	0.5	1	5	10	0	2	94	60	0	82	25	55	50	0	60	4.11227	7	1
2	70	165	62	22.7732	1	2	2	2	2	10	0	5	50	2	2	132	75	25	72	72	70	90	100	84	5.3059	0	1
2	54	160	50	19.5312	1	2	2	2	2	1	0	5	75	0	14	69	40	0	82	35	55	50	33.3333	52	6.1092	7	1
1	51	175	70	22.8571	1	2	3	1	2	7	0	7	10	0	2	72	85	75	84	62	65	80	66.6667	64	3.92563	3	1
2	43	160	67	26.1719	2	2	3	2	2	1	0	7	5	0	0	8	95	100	74	67	85	80	100	80	1.52561	7	1
2	71	158	60	24.0346	2	2	2	2	2	20	1	8	20	2	2	61	40	0	72	40	75	90	100	80	4.34555	3	1
2	72	159	49.5	19.5799	2	2	3	2	2	8	0	5	40	0	2	89	30	0	72	30	70	80	0	84	4.49401	5	1
2	75	152	43	18.6115	2	4	2	2	2	4	0	8	30	2	2	57	35	0	84	45	85	80	100	96	4.43808	2	1
1	71	168	53	18.7783	2	2	2	1	1	1	1	8	35	0	4	39	85	0	62	62	70	80	100	92	4.17449	2	1
1	60	170	75	25.9516	1	2	2	1	2	15	1	8	95	12	28	34	70	100	84	72	60	70	66.6667	72	7.73164	4	1
1	75	168	56	19.8413	2	2	2	1	2	12	0	8	35	0	0	123	80	100	84	72	80	80	100	88	3.85853	1	1
2	56	160	50	19.5312	1	2	3	2	2	1	1	5	35	2	5	121	80	50	84	57	60	70	0	72	5.49523	7	1
2	42	158	49	19.6283	2	2	3	2	2	14	0	6	30	4	2	105	80	25	72	60	70	60	66.6667	76	5.02973	4	1
2	62	150	60	26.6667	1	2	2	2	2	10	0	7	60	6	6	33	40	0	72	45	80	70	0	88	5.34513	3	1
1	70	172	60	20.2812	1	2	1	2	2	30	3	4	95	12	12	111	5	0	82	35	70	80	0	76	7.53652	7	1
2	60	162	42	16.0037	2	2	3	2	2	10	0	8	20	4	4	63	95	0	74	67	100	80	100	96	4.86019	2	1
2	75	160	60	23.4375	2	2	4	2	2	10	2	7	10	2	0	8	70	0	80	45	80	80	100	84	1.99159	3	1
2	51	150	55	24.4444	1	2	3	2	2	10	0	7	45	10	0	108	70	50	72	35	60	50	0	64	4.79293	7	1
2	36	162	69	26.2917	2	2	3	2	2	4	0	9	45	0	10	9	80	100	72	62	65	80	100	88	3.93893	1	1
1	56	167	80	28.6851	1	2	3	1	1	10	2	6	25	2	4	49	60	100	82	62	70	70	100	76	4.59025	0	1
2	58	160	47	18.3594	2	2	4	2	2	10	0	7	55	8	10	64	65	25	82	42	45	50	0	52	6.24405	7	1
2	49	160	75	29.2969	2	2	3	2	2	30	0	5	25	2	4	113	40	0	82	55	65	60	66.6667	68	5.17515	5	1
2	52	156	57.5	23.6275	2	2	3	2	2	1	0	7	35	3	5	99	75	75	82	57	75	60	100	88	5.44376	1	1
2	47	163	55	20.7008	1	2	4	2	2	13	0	10	5	0	0	44	95	100	74	72	80	90	100	88	2.71893	3	1
2	36	156	60	24.6548	2	2	4	2	2	3	0	7	15	0	6	14	95	100	74	62	65	40	0	72	3.42905	7	1
2	59	158	50	20.0288	1	2	3	2	2	30	0	5	50	6	6	61	45	25	72	45	70	60	66.6667	72	5.63518	3	1
2	61	160	57	22.2656	2	2	3	2	2	30	2	8	5	0	0	23	90	100	74	77	80	80	100	88	2.26485	2	1
2	50	158	43	17.2248	2	2	3	2	2	1	0	6	65	8	8	137	50	0	61	30	50	40	0	56	6.72987	7	1
2	59	162	58	22.1003	2	2	3	2	2	10	2	5	65	2	28	22	85	25	61	35	55	70	100	88	6.43295	3	1
2	57	161	49	18.9036	2	2	2	2	2	1	1	7	30	0	5	51	90	100	84	72	90	80	100	80	4.42448	1	1
1	61	165	52	19.1001	1	2	2	2	2	5	0	6	70	4	10	28	90	50	72	45	80	60	100	76	5.64342	7	1
2	62	158	60	24.0346	1	2	2	2	2	10	3	5	20	2	2	127	80	50	84	67	85	70	100	60	4.85887	5	1
2	56	158	55	22.0317	1	2	3	2	2	27	3	6	25	0	2	7	65	25	72	67	75	80	100	80	2.5041	1	1
2	76	152	45	19.4771	1	2	1	2	2	5	1	6	40	3	10	131	80	75	84	67	75	70	100	84	6.22849	1	1
2	74	160	47	18.3594	2	2	2	2	2	10	2	6	20	0	4	29	75	25	72	35	50	50	0	56	3.75711	4	1
2	42	158	50	20.0288	2	2	4	2	2	1	1	7	10	0	2	5	95	100	62	82	80	90	100	88	2.05857	0	1
2	45	164	70	26.0262	1	2	4	2	2	5	0	7	10	2	2	14	95	100	74	72	80	70	100	76	3.17528	1	1
2	46	160	42	16.4062	2	2	4	2	2	5	0	7	10	0	2	12	85	100	72	77	75	70	100	80	2.67139	0	1
2	54	152	50	21.6413	1	2	2	2	2	30	0	5	65	2	4	36	85	50	72	35	55	50	33.3333	72	4.93444	7	1
2	52	160	65	25.3906	2	2	3	2	2	15	1	8	20	0	0	73	80	75	84	45	60	50	33.3333	68	3.28332	6	1
2	75	160	60	23.4375	1	2	1	2	2	3	1	5	85	12	18	91	40	75	71	40	70	60	66.6667	72	7.69343	4	1
2	68	158	50	20.0288	1	2	2	2	2	1	1	5	65	0	0	99	25	0	82	40	50	50	33.3333	72	4.12658	7	1
2	39	160	64	25	2	2	3	2	2	1	0	6	30	0	2	21	95	100	74	45	80	60	100	88	3.34313	4	1
2	70	158	45	18.026	1	2	2	1	2	20	1	7	75	2	5	117	25	0	94	50	60	70	66.6667	64	6.0317	3	1
2	66	160	60	23.4375	1	2	2	2	2	10	1	5	50	0	1	37	40	0	82	35	60	30	66.6667	60	3.78764	4	1
1	58	165	61	22.4059	1	2	3	2	2	20	0	7	40	2	2	20	70	25	61	35	75	60	66.6667	76	3.84495	3	1
2	59	165	58	21.3039	1	2	3	2	2	1	0	7	20	0	0	90	80	75	94	67	75	80	100	84	3.42987	3	1
2	68	155	50	20.8117	1	2	2	2	2	1	1	6	65	0	8	99	25	0	71	30	80	50	33.3333	84	5.7105	5	1
1	71	176	51	16.4644	1	2	2	1	2	1	1	10	35	0	0	56	85	75	61	62	80	80	100	92	3.30775	2	1
2	54	160	50	19.5312	1	2	2	2	2	1	0	3	10	0	0	41	95	100	74	67	75	70	100	84	2.7395	2	1
1	66	175	70	22.8571	1	2	2	1	2	4	0	7	10	0	0	105	90	100	72	67	85	80	100	84	3.39777	2	1
1	60	177	62.5	19.9496	1	2	2	1	2	4	0	4	80	2	4	111	25	0	61	40	85	40	100	88	5.93265	3	1
2	50	165	54	19.8347	1	2	2	2	2	16	0	8	70	10	18	27	90	100	61	60	70	50	0	84	6.5484	7	1
1	76	172	75	25.3515	1	2	2	1	1	2	3	5	35	0	2	98	65	50	84	67	80	70	100	84	4.49144	2	1
2	89	158	37	14.8213	1	2	2	2	2	1	2	6	65	0	0	21	20	100	94	77	75	70	100	88	3.04117	1	1
2	46	156	49	20.1348	2	2	3	2	2	10	1	6	15	0	1	16	95	100	74	57	65	70	100	72	2.71081	2	1
2	67	152	34	14.7161	1	2	1	2	2	20	0	9	65	0	0	7	25	0	94	60	60	60	66.6667	64	2.27214	5	1
2	79	158	65	26.0375	1	2	1	2	2	35	3	6	65	2	4	76	10	0	82	55	55	40	100	52	5.45749	4	1
2	60	152	80	34.626	1	2	2	2	2	1	3	6	65	0	1	42	45	100	82	72	75	70	100	72	4.08637	1	1
2	53	156	49	20.1348	1	2	2	2	2	20	0	6	25	0	0	15	95	100	62	77	75	70	100	68	2.24564	1	1
2	82	156	60	24.6548	1	2	1	2	2	20	0	8	75	2	2	21	25	75	82	60	70	80	100	72	4.36911	1	1
1	55	182	84	25.3593	2	2	4	1	1	3	2	7	65	0	6	81	80	50	72	35	70	80	100	88	5.35783	2	1
2	52	163	53	19.9481	1	2	1	2	2	20	0	8	40	0	2	7	75	100	72	45	65	60	33.3333	60	2.7141	3	1
2	65	156	40	16.4366	1	2	2	2	2	3	1	6	75	0	15	95	30	0	82	35	40	50	33.3333	52	6.40658	6	1
2	79	150	55	24.4444	1	2	1	2	2	3	1	7	45	0	2	19	80	100	61	72	70	60	100	76	3.48307	1	1
2	83	155	60	24.974	1	2	2	2	2	8	1	5	70	6	0	31	30	50	82	62	55	60	100	56	4.06965	3	1
1	59	171	55	18.8092	1	2	4	1	2	20	1	7	30	1	1	77	90	100	84	72	65	70	100	80	4.30066	0	1
2	55	165	70	25.7117	1	2	3	2	2	2	0	4	45	0	6	92	65	0	61	40	70	30	0	60	5.16697	4	1
1	50	176	85	27.4406	2	2	3	1	1	15	1	8	10	0	1	95	15	0	72	57	70	50	0	88	3.88771	3	1
2	59	150	45	20	1	4	3	2	2	40	2	4	90	14	20	68	30	0	82	60	55	50	100	44	7.76572	0	1
2	47	155	59	24.5578	2	2	3	2	2	18	2	7	45	2	4	50	50	0	72	57	75	70	0	76	4.8844	3	1
2	66	153	49	20.9321	1	2	2	2	2	8	0	6	55	0	2	91	75	25	94	35	55	30	66.6667	52	4.71956	7	1
2	65	150	55	24.4444	1	2	1	2	2	26	0	5	75	2	2	79	25	50	94	62	70	70	100	64	5.29655	2	1
1	55	160	70	27.3438	2	2	3	1	1	11	1	8	45	2	2	38	85	100	84	40	55	60	100	64	4.36425	1	1
2	60	150	52	23.1111	1	2	1	2	2	25	1	4	35	0	1	16	80	100	84	62	70	40	100	84	2.99081	0	1
2	73	145	32	15.22	1	2	2	2	2	13	3	3	85	0	4	30	0	0	82	47	65	30	100	72	4.69084	1	1
2	59	153	60	25.6312	1	2	1	2	2	7	2	8	40	1	2	53	50	0	94	55	70	40	100	76	4.41116	3	1
2	77	158	60	24.0346	2	2	3	2	2	2	1	5	75	2	4	16	15	0	94	55	50	70	66.6667	68	4.50679	2	1
2	52	169	50	17.5064	1	2	3	2	2	5	1	7	15	0	1	49	95	100	74	55	50	50	0	48	3.49427	0	1
1	50	172	70	23.6614	1	2	3	2	2	10	1	9	10	0	0	15	95	100	74	82	85	90	66.6667	88	2.03564	3	1
2	78	155	62	25.8065	2	2	4	2	2	1	2	5	85	8	8	43	35	25	82	52	70	70	100	88	6.19872	4	1
2	81	155	46	19.1467	1	2	3	2	2	5	3	4	90	16	20	154	5	0	82	45	45	60	66.6667	60	8.41026	2	1
1	27	171	69	23.597	2	2	5	2	2	11	0	10	20	1	2	62	95	100	62	30	60	70	0	60	4.24095	2	1
1	54	170	65	22.4913	1	2	3	1	1	5	1	9	25	0	0	34	85	100	72	72	60	60	100	56	2.81845	1	1
2	54	155	59	24.5578	1	2	2	2	2	7	2	5	65	6	3	107	35	0	82	10	55	30	33.3333	52	5.83679	2	1
1	74	176	83	26.7949	2	2	3	2	2	1	4	5	90	12	6	54	25	25	71	35	40	30	0	48	6.39395	6	1
1	61	176	80	25.8264	2	2	5	1	2	1	3	9	40	2	4	82	85	100	61	42	45	50	33.3333	64	5.16068	4	1
1	61	170	77	26.6436	2	2	3	2	2	1	0	8	20	0	1	3	90	100	84	77	70	90	100	80	1.60903	2	1
1	65	165	45	16.5289	1	2	2	1	1	43	3	4	50	5	1	36	95	100	62	67	75	60	66.6667	80	4.39456	7	1
2	57	163	57	21.4536	1	2	5	2	2	26	1	8	5	1	1	52	95	100	74	72	85	80	100	80	3.67587	2	1
1	76	170	65	22.4913	1	2	2	1	1	5	2	7	55	0	2	40	60	100	94	77	80	90	100	84	4.14418	1	1
2	51	150	53	23.5556	1	2	1	2	2	12	0	9	10	0	0	7	100	100	74	82	70	70	66.6667	72	1.50214	5	1
1	66	170	74	25.6055	1	2	3	1	1	3	1	6	55	0	11	102	90	100	72	77	65	90	100	84	5.86479	4	1
1	60	170	81	28.0277	2	2	4	1	2	28	2	7	40	2	2	63	90	0	74	67	75	80	100	88	4.64813	6	1
2	54	165	65	23.8751	1	2	2	2	2	24	3	6	60	1	0	6	80	50	72	70	45	60	100	44	2.37423	2	1
1	48	171	75	25.6489	2	2	3	1	1	1	0	8	25	0	2	81	95	100	74	82	80	80	100	80	4.21807	2	1
2	48	165	51	18.7328	2	3	3	2	2	24	0	7	55	11	4	21	85	100	72	62	50	60	33.3333	60	4.94982	3	1
2	61	160	46	17.9688	1	2	2	2	2	20	1	8	45	2	6	69	40	0	84	50	80	70	0	88	5.36157	6	1
2	60	160	75	29.2969	1	2	4	2	2	7	2	8	70	10	12	45	30	0	84	52	75	80	0	84	6.47	7	1
2	28	148	55	25.1096	1	2	2	2	2	21	0	5	35	1	1	80	80	75	72	35	50	60	33.3333	52	4.39742	7	1
2	58	165	69	25.3444	1	2	1	2	2	6	2	3	10	1	1	29	80	50	72	55	50	60	100	72	3.33711	3	1
2	51	155	57	23.7253	1	2	2	2	2	24	1	7	25	0	1	47	85	50	72	55	55	50	66.6667	52	3.6051	4	1
1	61	170	60	20.7612	1	2	2	1	1	1	2	8	40	0	1	119	70	50	61	67	65	60	100	72	4.46539	4	1
2	64	168	80	28.3447	1	2	3	2	2	8	1	2	25	0	0	62	85	0	62	45	50	40	100	72	3.23899	6	1
1	71	168	48	17.0068	1	2	2	1	1	1	0	7	35	1	2	92	35	50	82	55	55	60	100	64	4.72721	2	1
2	67	155	50	20.8117	1	2	2	2	2	5	0	6	35	2	2	48	85	100	72	55	70	70	100	80	4.38778	1	1
2	61	160	41	16.0156	2	2	2	2	2	22	1	6	45	0	0	7	50	100	94	72	60	80	100	84	1.99214	2	1
2	66	255	46	7.0742	2	4	4	2	2	35	1	5	65	1	10	67	35	0	61	40	50	50	0	68	5.90416	3	1
2	57	163	64	24.0882	2	2	4	2	2	2	1	8	15	0	4	29	95	100	74	82	85	90	100	88	3.68711	0	1
2	64	165	58	21.3039	2	2	3	2	2	1	0	8	20	1	0	22	85	100	72	62	65	70	100	72	2.72373	2	1
2	53	158	61	24.4352	1	2	2	2	2	1	0	7	30	1	1	84	85	100	84	72	80	70	100	76	4.36157	1	1
2	61	157	60	24.3418	1	2	3	2	2	32	0	7	35	0	1	14	85	100	84	67	60	60	100	76	2.89734	1	1
2	48	160	59	23.0469	1	2	2	2	2	3	0	7	45	2	2	44	85	100	72	40	60	60	0	68	4.46687	3	1
2	41	158	78	31.245	1	2	2	2	2	1	0	7	25	2	0	19	100	100	74	62	70	70	100	76	2.80709	2	1
2	47	158	52	20.83	1	2	2	2	2	21	1	5	45	6	2	7	85	100	82	30	65	60	0	56	3.46995	3	1
2	50	152	62	26.8352	1	2	2	2	2	8	1	8	10	0	1	38	95	100	74	67	80	90	100	84	3.24631	1	1
2	60	158	72	28.8415	2	2	4	2	2	10	0	6	40	2	6	78	85	100	84	67	65	80	100	80	5.37739	0	1
2	62	158	60	24.0346	1	2	1	2	2	12	2	7	25	0	0	124	65	0	74	62	95	80	100	96	3.7242	4	1
2	57	160	61	23.8281	1	2	3	2	2	6	1	3	45	3	3	76	40	0	84	45	60	80	66.6667	80	5.11644	2	1
2	70	150	50	22.2222	1	4	1	2	2	13	1	9	70	6	12	89	40	0	84	67	80	80	0	88	6.7478	7	1
1	76	170	60	20.7612	1	2	2	1	1	31	2	9	55	1	1	41	45	0	84	57	75	80	100	76	4.2095	3	1
2	59	155	65	27.0552	1	2	2	2	2	10	3	6	70	2	16	17	60	0	84	60	65	70	100	76	5.59923	3	1
2	70	152	47	20.3428	1	2	1	2	1	7	1	4	80	12	10	42	20	0	71	30	30	30	0	28	6.47719	3	1
2	60	158	57	22.8329	2	2	2	2	2	14	0	9	10	0	0	14	95	100	74	82	85	90	100	84	1.98734	2	1
2	57	152	49	21.2084	2	2	1	2	2	1	1	7	75	2	6	45	20	0	72	30	45	40	0	56	5.48236	7	1
2	35	160	55	21.4844	2	2	2	2	2	5	1	8	10	1	2	18	85	100	84	72	80	70	100	84	3.23522	1	1
2	36	150	52	23.1111	1	2	2	2	2	5	1	8	65	0	12	17	50	50	72	72	80	70	100	84	4.83315	1	1
1	57	169	55	19.257	2	2	3	1	1	2	0	7	50	10	6	60	95	75	62	72	85	80	100	88	5.82319	3	1
1	44	168	64	22.6757	2	2	3	1	1	4	1	7	10	0	0	12	90	100	74	67	85	70	100	80	1.87943	3	1
2	61	158	52	20.83	1	2	3	2	2	1	1	9	45	6	10	69	80	100	72	67	70	90	100	80	6.05061	3	1
2	87	150	56	24.8889	1	4	1	2	2	10	0	4	75	2	16	8	85	75	74	62	80	80	100	84	5.14159	5	1
1	73	168	59	20.9042	1	2	3	1	1	7	0	4	60	10	8	86	85	100	74	72	65	70	100	80	6.4274	4	1
1	21	177	55	17.5556	2	1	4	1	2	2	0	9	45	6	2	37	70	0	62	40	65	80	100	80	4.63546	5	1
1	50	172	69	23.3234	1	2	3	1	1	10	0	5	20	0	0	67	95	100	74	35	70	80	100	76	3.22328	4	1
2	56	160	55	21.4844	2	4	4	2	1	8	1	4	40	4	10	4	85	100	84	62	55	50	33.3333	64	3.86128	4	1
1	67	160	60	23.4375	2	2	1	2	1	4	2	8	75	1	6	98	30	0	72	55	65	70	100	80	5.91119	4	1
2	68	155	44	18.3143	1	2	1	2	2	5	3	2	90	22	20	89	5	0	71	25	60	70	0	60	8.21976	7	1
2	55	156	45	18.4911	2	2	2	2	2	1	0	8	65	2	10	32	95	0	74	67	80	90	100	88	5.50287	4	1
2	78	160	58	22.6562	2	2	1	2	2	18	1	8	80	2	4	31	15	0	82	50	50	70	100	64	5.03977	5	1
2	54	150	59	26.2222	1	2	2	2	2	18	0	6	55	2	4	31	85	50	84	35	60	70	66.6667	60	4.68977	4	1
2	55	154	61.5	25.9319	2	2	3	2	2	18	2	8	5	0	1	7	95	100	74	72	65	80	100	84	1.99214	2	1
1	67	168	80	28.3447	1	2	2	1	1	3	0	5	50	10	10	13	85	50	84	50	60	50	100	60	5.15178	6	1
1	72	173	69	23.0546	1	2	2	1	2	1	1	10	40	0	2	76	65	50	72	55	55	60	66.6667	60	4.38347	6	1
2	54	156	53.3	21.9017	2	2	2	2	2	16	0	6	30	0	6	15	65	50	62	57	55	40	66.6667	52	3.68735	6	1
2	62	149	61.5	27.7015	2	2	3	2	2	13	0	5	50	2	4	28	55	75	84	55	55	80	100	68	4.54852	5	1
2	57	154	64	26.986	2	2	3	2	2	24	3	9	40	1	2	91	25	0	82	40	65	60	0	76	4.78956	5	1
2	58	149	58	26.1249	1	2	2	2	2	30	0	3	40	2	4	63	30	0	84	45	90	80	0	92	4.97617	7	1
2	52	169	64	22.4082	2	2	3	2	2	26	0	4	30	2	14	67	45	0	84	35	70	80	0	80	5.85459	4	1
2	61	158	60	24.0346	1	2	2	2	2	4	0	7	10	0	2	86	75	0	51	35	75	70	0	80	4.05	7	1
2	40	155	60	24.974	1	2	2	2	2	7	1	8	25	2	2	75	95	100	74	82	80	80	100	80	4.56018	2	1
2	39	163	56	21.0772	2	2	3	2	2	3	1	7	40	10	12	38	95	100	74	62	85	80	100	88	5.93164	2	1
1	60	168	51	18.0697	1	2	3	1	2	10	0	3	50	2	2	125	25	0	72	20	50	60	0	52	5.26776	7	1
1	61	171	85	29.0688	2	2	4	2	1	1	2	7	50	2	12	25	75	0	62	45	90	80	100	88	5.28909	5	1
2	57	155	60	24.974	2	2	2	2	2	20	1	8	30	1	4	28	85	50	84	65	85	90	100	80	4.15254	2	1
2	48	147	57.2	26.4705	1	2	2	2	2	1	1	7	50	2	8	51	75	50	62	35	40	40	66.6667	52	5.43218	7	1
2	28	152	47.4	20.5159	2	2	4	2	2	1	1	5	60	8	10	83	35	0	61	30	50	20	0	52	6.49602	7	1
2	51	167	64	22.9481	2	2	2	2	2	9	0	8	65	10	12	33	25	0	72	55	75	80	0	84	6.18289	7	1
2	83	150	42	18.6667	2	4	1	2	2	1	1	6	80	2	2	49.5	5	0	82	25	65	80	0	76	5.03932	6	1
2	60	153	38	16.2331	1	2	1	2	2	23	0	8	55	0	12	36	40	0	84	77	85	80	100	84	5.21836	3	1
2	28	158	45	18.026	2	1	5	2	2	1	0	7	20	0	5	25	90	50	74	62	25	70	66.6667	24	3.78541	3	1
2	69	160	60	23.4375	2	2	2	2	2	4	3	8	10	0	1	12	85	100	84	72	75	80	100	84	2.43943	3	1
2	52	152	44	19.0443	2	2	3	2	2	6	0	4	30	2	2	29	35	0	72	62	90	90	100	92	3.96505	4	1
2	74	140	48	24.4898	1	2	2	2	2	23	3	3	20	22	24	75	80	25	74	67	90	90	100	88	7.35899	5	1
2	53	160	48	18.75	2	2	2	2	2	6	2	7	20	0	4	12	10	0	84	35	70	80	0	88	3.13943	7	1
2	48	158	70	28.0404	1	2	2	2	2	1	1	6	65	20	24	87	40	0	84	40	75	80	100	88	8.03176	3	1
2	43	167	54.2	19.4342	1	2	4	2	2	6	1	8	80	0	0	13	95	75	74	67	45	60	100	64	2.91546	5	1
2	59	166	49.9	18.1086	1	2	1	2	2	15	1	7	20	0	0	38	85	75	62	45	45	50	66.6667	56	2.82631	6	1
2	59	147	45.5	21.056	2	4	2	2	2	30	1	7	20	0	0	108	70	100	74	60	80	80	100	88	3.55749	5	1
2	69	157	49.7	20.1631	1	2	2	2	2	7	1	7	10	0	0	29	45	75	94	55	55	80	100	40	2.49711	6	1
1	61	164	54	20.0773	2	2	4	1	2	17	0	8	20	2	20	37	65	0	72	30	75	60	100	72	5.70802	4	1
2	42	155	49	20.3954	1	2	3	1	1	3	0	8	10	4	4	63	90	0	74	35	90	70	100	76	4.72019	7	1
1	72	164	56.7	21.0812	1	2	3	1	1	7	1	5	80	1	1	102	80	0	62	45	50	50	66.6667	44	5.19748	7	1
2	49	161	74.6	28.7798	2	2	3	2	2	10	1	7	40	2	2	11	75	100	72	50	65	80	100	76	3.42647	5	1
1	63	165	45	16.5289	2	2	1	1	1	10	0	6	30	10	10	81	0	0	62	35	80	40	0	80	6.15243	7	1
2	76	162	80	30.4832	2	2	1	2	2	4	2	9	70	12	14	21	40	0	94	20	55	30	0	44	6.17644	15	2
2	68	156	50	20.5457	1	2	1	2	2	20	1	7	20	4	4	68	50	0	72	45	75	80	0	80	4.91366	9	2
2	72	152	60	25.9695	1	2	1	2	2	10	2	8	40	2	15	99	25	0	82	20	40	30	33.3333	48	6.34143	14	2
2	72	150	40	17.7778	1	2	1	2	2	30	1	7	80	2	28	70	40	0	72	45	75	80	0	84	7.45317	8	2
2	52	150	46	20.4444	1	2	2	2	2	1	1	6	15	3	3	66	40	0	72	45	70	80	0	72	4.59768	9	2
2	53	150	57	25.3333	1	2	3	2	2	2	0	8	40	8	12	45	40	0	72	45	75	80	0	84	5.95652	8	2
2	62	155	46	19.1467	1	2	2	2	2	30	1	2	80	28	28	120	0	0	71	25	40	50	0	60	8.91611	9	2
1	50	156	60	24.6548	1	2	2	2	2	16	1	6	35	1	7	92	5	0	71	30	55	40	33.3333	68	5.41687	9	2
1	51	185	60	17.531	2	2	4	2	2	10	0	8	10	2	2	113	40	0	72	50	70	80	0	80	4.63711	9	2
1	74	163	60	22.5827	1	2	2	1	2	4	3	8	80	12	28	61	35	0	61	30	65	70	0	60	7.9308	10	2
2	48	161	50	19.2894	2	2	3	2	1	2	1	7	0	0	0	9	95	0	74	72	85	70	100	84	1.53806	8	2
2	57	160	62	24.2188	1	2	2	2	2	10	1	7	30	1	7	71	95	0	74	72	85	70	100	84	5.1655	9	2
2	61	154	50	21.0828	2	2	4	2	2	1	2	6	10	2	2	27	35	0	72	35	60	80	0	84	3.63503	8	2
2	69	160	49.5	19.3359	1	2	1	2	2	7	1	5	10	0	1	6	30	0	72	30	65	70	0	64	1.95423	11	2
2	65	155	40	16.6493	1	2	1	1	2	1	1	10	20	3	3	127	5	0	82	35	65	70	33.3333	64	5.12585	11	2
2	66	163	68	25.5937	1	2	2	2	2	19	1	5	0	0	0	21	25	0	84	30	65	80	0	68	2.13117	10	2
2	49	158	55	22.0317	1	2	2	1	2	23	1	5	30	2	7	66	35	0	82	35	75	70	33.3333	84	5.23036	9	2
2	55	160	57	22.2656	1	2	1	1	2	10	1	9	5	0	1	31	40	0	84	45	75	70	0	84	3.03379	10	2
2	78	150	44	19.5556	1	2	1	1	2	2	1	5	20	0	4	92	50	0	84	40	75	80	0	80	4.56525	9	2
2	67	145	40	19.025	1	4	1	2	2	20	1	5	80	2	28	64	5	0	71	30	60	80	100	76	7.39044	10	2
2	68	170	53	18.3391	1	4	1	2	2	2	1	5	50	10	12	83	75	0	51	45	80	60	100	88	6.61852	9	2
2	46	168	55	19.487	2	2	3	2	2	1	1	8	10	1	2	51	80	0	74	62	75	80	100	80	3.96424	9	2
2	69	168	70	24.8016	2	2	1	2	2	14	1	10	65	11	12	78	25	0	72	45	65	80	0	80	6.82825	9	2
1	43	180	80	24.6914	1	2	5	1	2	4	1	9	20	4	4	57	85	0	62	57	75	80	100	84	4.79014	9	2
1	78	175	54	17.6327	1	2	1	1	2	20	1	3	55	12	14	47	25	0	72	30	60	80	0	76	6.53038	10	2
2	60	165	47	17.2635	1	2	2	2	2	20	1	7	35	1	7	37	25	0	72	30	70	70	0	84	4.77926	10	2
2	21	150	47	20.8889	1	1	4	1	2	10	1	10	30	6	6	18	95	0	51	35	65	50	0	72	4.50083	10	2
2	78	156	44	18.0802	1	2	1	2	2	1	1	8	12	1	12	13	55	0	72	35	65	80	0	72	4.18336	12	2
2	55	164	54.5	20.2632	1	2	2	1	2	1	1	6	20	2	4	148	65	0	62	25	70	60	0	84	5.29403	8	2
2	68	141	37	18.6107	1	2	3	2	2	30	1	6	45	10	10	87	40	0	72	45	60	80	0	72	6.41245	9	2
2	38	150	67.5	30	1	2	3	2	2	10	1	4	80	10	28	116	40	0	71	15	25	30	0	32	8.29619	8	2
2	58	153	35	14.9515	1	2	2	2	2	20	1	7	55	12	8	82	25	0	94	25	50	40	100	60	6.40857	10	2
2	72	165	40	14.6924	1	2	3	2	2	20	1	4	10	1	2	114	10	0	71	25	70	80	0	76	4.5273	8	2
2	50	160	52	20.3125	1	2	2	2	2	0.1	1	6	15	0	3	20	75	0	62	55	65	80	0	84	3.27696	8	2
2	51	150	48	21.3333	1	2	2	2	2	1	1	6	90	28	28	36	35	0	72	45	65	70	0	68	8.21333	8	2
2	67	158	50	20.0288	2	2	1	2	2	1	1	3	20	0	10	29	60	0	94	30	50	40	0	56	4.40798	8	2
2	67	165	60	22.0386	1	2	3	2	1	1	0	7	50	10	2	54	45	0	72	25	45	30	0	36	5.16969	9	2
2	53	160	45	17.5781	1	2	1	2	2	10	1	4	60	2	14	27	15	0	71	10	50	30	0	32	5.63839	9	2
1	61	160	45	17.5781	1	2	2	1	2	10	0	5	70	6	18	69	0	0	82	15	30	30	0	40	7.00561	9	2
2	56	155	42	17.4818	1	2	2	2	2	8	0	6	50	2	8	67	0	0	82	30	40	30	0	40	5.62318	8	2
2	71	165	57	20.9366	1	2	2	2	2	20	0	5	80	4	20	146	0	0	71	20	20	20	0	36	7.67292	11	2
2	74	154	35	14.758	1	2	1	2	2	1	2	6	25	2	3	92	70	0	61	40	70	60	0	76	4.88118	8	2
2	54	150	43	19.1111	1	2	2	2	2	20	1	5	20	0	0	56	0	0	71	20	40	30	0	48	3.09775	8	2
2	69	150	50	22.2222	1	2	1	2	2	1	1	6	50	10	4	104	20	0	71	25	35	40	0	52	5.95651	8	2
2	60	160	61	23.8281	1	2	3	2	2	18	2	7	70	10	6	73	10	0	82	30	40	20	0	36	6.24047	10	2
2	67	165	45	16.5289	2	2	1	2	2	11	2	7	25	4	4	106	30	0	82	50	70	80	0	80	5.29441	8	2
2	74	152	42	18.1787	1	2	1	2	2	40	1	5	10	0	2	35	20	0	71	40	60	60	0	68	3.4207	11	2
2	60	162	46	17.5278	2	2	3	2	2	12	1	4	60	1	28	10	35	0	72	40	60	70	0	56	5.69505	14	2
2	71	162	47	17.9089	1	4	1	2	2	2	2	7	65	0	28	22	45	0	72	45	65	70	0	68	6.03697	10	2
2	62	148	51.5	23.5117	1	2	2	2	2	20	1	5	30	0	2	108	20	0	71	35	50	50	0	56	4.48945	8	2
2	52	162	62	23.6244	1	2	2	2	2	5	0	6	30	0	2	28	85	25	61	30	40	40	0	36	3.5445	9	2
2	71	160	70	27.3438	1	2	2	1	2	10	0	3	55	6	15	6	65	0	82	25	55	50	0	52	4.87896	13	2
2	55	167	58	20.7967	1	2	3	2	2	0.3	0	8	65	2	3	129	40	0	82	35	55	40	0	56	5.6778	8	2
2	55	165	58	21.3039	1	2	3	2	2	2	1	7	15	2	4	84	30	0	71	20	55	40	0	48	4.82755	13	2
2	74	160	67	26.1719	1	4	1	2	2	10	2	7	55	2	4	5	25	0	71	30	40	80	0	48	3.41259	12	2
2	52	150	50	22.2222	2	2	3	2	2	10	1	4	80	0	2	97	0	0	71	25	40	20	0	32	5.11426	12	2
2	57	148	27	12.3265	2	1	2	2	2	20	0	3	90	2	4	37	0	0	82	10	35	20	0	40	5.30362	12	2
2	56	167	78	27.968	1	2	3	2	2	1	1	7	55	4	10	75	30	0	82	20	35	20	0	28	6.12312	15	2
2	71	158	37	14.8213	1	2	1	2	2	1	1	4	75	6	14	135	0	0	71	35	50	40	0	48	7.26488	13	2
2	68	152	53	22.9398	1	2	2	2	2	30	2	3	45	2	6	47	85	75	62	35	65	60	0	56	5.0928	12	2
2	72	151	47.5	20.8324	2	4	2	2	2	2	0	8	80	4	16	77	5	0	82	35	45	60	0	56	6.96066	9	2
2	61	157	45	18.2563	2	2	2	2	2	20	1	6	70	2	10	80	20	0	82	35	50	40	0	48	6.21427	8	2
2	88	160	43	16.7969	2	2	4	2	2	20	1	4	90	2	18	15	0	0	71	20	30	20	0	24	5.92749	10	2
1	72	175	66	21.551	2	2	3	1	1	1	1	4	95	2	16	66	10	0	71	25	50	30	0	32	6.89874	11	2
2	76	156	56	23.0112	1	2	1	2	2	4	0	4	85	7	7	69	10	0	71	25	40	30	0	36	6.37631	10	2
2	78	155	36	14.9844	1	2	2	2	2	2	1	5	95	4	1	107	5	0	71	25	40	30	0	44	5.72098	8	2
2	33	158	42	16.8242	2	2	3	2	2	14	0	4	95	14	24	130	25	0	82	25	50	30	0	68	8.52837	8	2
2	82	158	55	22.0317	2	2	2	2	2	3	2	2	95	2	16	76	10	0	71	25	45	20	0	48	6.99749	13	2
2	58	159	45	17.7999	2	2	4	2	2	1	0	4	20	0	0	104	65	0	72	30	60	30	0	40	3.53107	12	2
2	73	163	76	28.6048	1	2	2	2	2	5	2	5	95	8	20	25	0	0	62	15	30	10	0	20	6.87957	14	2
2	53	159	32.5	12.8555	1	2	2	2	2	20	0	4	99	3	24	113	0	0	62	10	40	10	0	24	7.92357	18	2
2	47	160	66	25.7812	2	2	4	2	2	3	0	5	30	0	2	84	85	50	72	45	65	50	0	56	4.31353	9	2
2	36	162	65	24.7676	2	2	4	2	2	2	0	5	15	0	1	63	90	100	61	35	75	20	0	56	3.67019	10	2
1	51	172	55	18.5911	2	2	3	1	1	1	2	4	40	0	2	26	85	75	84	50	65	50	0	72	3.63263	10	2
2	47	150	46	20.4444	2	2	2	2	2	6	1	4	75	2	2	39	30	0	71	25	35	10	0	20	4.80243	15	2
2	60	153	60	25.6312	1	2	2	2	2	40	0	5	90	10	6	55	0	0	71	25	60	40	33.3333	64	6.32229	11	2
2	64	158	53	21.2306	2	2	3	2	2	14	1	6	85	2	10	64	30	0	62	25	20	20	0	28	6.26807	12	2
2	56	160	75	29.2969	1	2	2	2	2	20	2	5	65	0	2	109	25	0	82	60	50	20	0	32	4.9859	9	2
1	73	160	55	21.4844	2	2	1	1	1	10	1	5	95	2	16	125	10	0	62	25	35	10	0	32	7.3458	10	2
2	57	152	46	19.91	1	2	1	1	2	8	0	4	75	0	3	72	25	0	62	25	35	10	0	28	5.01361	14	2
2	53	158	40	16.0231	1	2	1	2	2	35	1	4	45	0	2	121	70	0	72	30	25	20	0	24	4.77901	12	2
2	73	160	75	29.2969	2	2	1	2	2	5	2	6	85	2	10	22	20	0	71	5	30	20	0	24	5.52059	10	2
2	49	158	56	22.4323	1	2	2	2	2	1	1	4	85	6	12	26	10	0	62	20	45	20	0	28	6.09642	16	2
2	75	162	65	24.7676	1	2	1	2	2	10	2	6	95	4	8	80	0	0	62	10	20	20	0	20	6.54134	14	2
2	46	158	55	22.0317	2	2	1	2	2	20	0	8	10	0	2	7	90	100	72	72	80	60	0	72	2.2941	9	2
1	67	172	65	21.9713	1	2	2	1	1	4	2	3	55	1	1	85	80	0	72	40	50	50	0	36	4.71986	8	2
2	81	155	68	28.3039	1	2	1	2	2	14	2	4	75	1	0	65	5	100	82	40	60	30	33.3333	36	4.25207	9	2
2	53	156	53	21.7784	1	2	2	2	2	3	1	5	30	0	0	24	95	100	74	32	30	30	0	52	2.64464	9	2
2	47	155	55	22.8928	1	2	2	2	2	8	1	4	50	0	0	122	20	0	82	40	55	30	0	56	4.06281	14	2
1	74	168	68	24.093	1	2	1	1	2	1	0	3	85	4	12	12	80	0	72	25	65	40	0	52	5.42933	11	2
2	48	160	60	23.4375	2	2	2	2	2	25	1	4	65	6	12	35	30	0	94	25	60	50	33.3333	36	6.0245	10	2
2	74	163	59	22.2063	2	2	4	2	2	17	0	4	70	4	2	31	40	0	82	30	30	30	0	36	4.73575	14	2
1	51	165	52.5	19.2837	1	2	3	1	2	1	1	5	25	0	2	21	30	0	82	5	30	20	0	32	3.27313	10	2
2	71	165	68	24.977	1	2	1	2	2	12	2	2	65	2	10	110	5	0	82	10	20	40	100	24	6.36719	10	2
1	54	158	68	27.2392	1	2	2	2	2	1	2	9	35	0	0	7	85	50	84	5	35	20	0	32	1.85214	11	2
1	63	178	72	22.7244	1	2	3	2	2	1	3	7	65	10	14	69	25	0	71	15	30	20	0	32	6.85464	13	2
1	64	178	66	20.8307	1	2	3	2	2	6	2	6	85	10	14	60	25	0	71	15	30	0	0	32	7.03681	9	2
1	61	172	88	29.7458	2	2	3	2	2	24	0	10	85	10	20	77	70	50	61	20	40	50	0	32	7.6205	9	2
2	57	155	70	29.1363	1	2	3	2	2	23	2	5	85	12	2	45	10	0	71	10	25	10	0	32	5.61657	18	2
1	74	173	75	25.0593	2	2	4	1	2	11	1	4	85	1	17	114	30	0	71	0	30	10	0	36	7.09428	17	2
2	68	158	48	19.2277	2	2	1	2	2	6	0	3	45	0	14	113	70	0	74	40	70	80	0	72	6.0345	9	2
1	50	170	82	28.3737	1	2	2	1	1	15	2	5	90	4	14	134	25	0	71	10	30	0	0	20	7.34382	17	2
2	70	155	47	19.563	1	2	1	2	2	10	2	5	50	0	4	7	60	50	82	30	50	30	0	48	3.18214	8	2
2	59	161	80	30.863	1	2	3	2	1	10	1	7	50	1	1	14	55	0	94	15	45	40	33.3333	40	3.38734	8	2
2	46	155	46	19.1467	1	2	2	2	2	1	2	7	50	0	2	100	90	100	84	62	70	70	33.3333	76	4.71558	9	2
2	59	158	50	20.0288	1	2	1	2	2	12	3	5	95	4	20	55	5	0	71	5	40	0	0	24	7.19953	17	2
2	76	156	54	22.1893	2	4	1	2	2	30	1	3	60	2	12	17	10	0	94	35	60	80	0	68	5.15913	10	2
1	64	162	50	19.052	2	2	3	1	1	10	1	7	40	2	2	19	50	0	84	40	55	80	0	72	3.80905	8	2
1	70	170	55	19.0311	2	2	2	1	1	28	1	5	95	10	20	20	0	0	62	5	5	0	0	12	6.81685	19	2
2	56	157	42	17.0392	1	2	3	2	2	9	0	6	65	3	9	43	25	0	71	35	40	30	0	32	5.70781	13	2
2	59	150	61	27.1111	1	2	1	2	2	41	1	4	85	14	10	136	0	0	82	15	15	10	0	20	7.4474	15	2
2	69	160	38	14.8438	1	2	2	2	2	5	0	2	95	14	28	124	0	0	50	35	10	10	0	28	8.7151	18	2
2	69	150	50	22.2222	1	2	2	2	2	3	0	4	85	12	24	36	35	0	62	30	40	40	0	28	7.41184	19	2
1	58	165	50	18.3655	1	2	2	1	1	1	0	5	85	14	20	92	30	0	62	40	40	40	0	36	7.90731	15	2
2	56	159	53	20.9644	1	2	2	2	2	3	0	6	35	1	1	87	80	0	61	40	40	60	0	56	4.45614	14	2
2	61	160	65	25.3906	2	2	3	2	2	20	1	6	70	12	8	49	25	0	62	40	30	10	0	20	6.25814	17	2
2	75	150	49	21.7778	2	2	1	2	2	23	1	7	85	12	20	100	25	0	82	50	35	50	66.6667	44	7.88796	8	2
2	60	158	43.5	17.4251	1	2	3	2	2	30	1	5	90	8	19	48	0	0	62	10	15	20	0	12	7.20278	20	2
1	62	175	58	18.9388	2	2	4	1	2	14	2	5	75	12	22	15	25	0	71	35	50	70	0	52	6.54222	9	2
1	77	170	69	23.8754	1	2	1	1	2	32	1	5	90	26	12	26	15	0	62	35	45	40	0	44	6.90829	12	2
2	78	160	61	23.8281	1	4	2	2	2	35	2	6	85	12	18	113	10	0	62	20	25	10	0	24	7.845	18	2
2	75	155	46	19.1467	1	3	1	1	1	3	3	6	90	10	20	100	10	0	82	15	25	0	0	28	7.87345	12	2
2	46	160	70	27.3438	1	2	2	2	2	7	0	4	95	8	20	82	5	0	50	5	20	0	0	20	7.71106	17	2
2	70	155	60	24.974	1	2	2	2	2	24	1	7	80	2	2	44	10	0	82	35	55	40	0	60	4.95687	10	2
2	67	160	52	20.3125	1	2	1	2	2	20	1	4	95	10	18	155	10	0	71	30	30	20	0	24	8.12171	14	2
2	66	152	40	17.313	1	2	1	2	2	5	2	6	55	2	2	71	65	25	72	35	55	60	0	56	4.94182	9	2
2	59	158	54	21.6311	1	2	2	2	2	2	1	4	70	6	10	20	65	0	72	35	50	50	0	52	5.53375	12	2
2	61	152	60	25.9695	1	2	1	2	2	3	1	3	45	10	3	13	85	100	72	57	70	70	66.6667	60	4.28085	9	2
2	49	154	43	18.1312	2	2	3	2	2	10	1	6	50	0	3	21	85	100	62	25	45	20	0	36	3.80111	17	2
2	65	149	50	22.5215	1	2	1	2	2	14	1	5	75	10	8	47	20	0	71	15	30	20	0	28	6.21446	15	2
1	82	165	64	23.5078	1	2	4	1	1	6	3	5	95	12	12	7	10	0	61	25	35	70	0	36	5.60198	13	2
2	56	155	49	1	1	2	2	2	2	3	0	8	50	6	2	5	85	100	62	40	50	30	0	56	3.30442	13	2
2	75	150	45	20	1	2	1	2	2	6	1	6	80	2	20	93	0	0	71	15	25	10	0	24	7.1932	10	2
2	77	150	42	18.6667	1	2	2	2	2	1	0	7	85	1	14	42	5	0	82	25	45	40	0	28	6.1817	10	2
2	88	167	58	20.7967	2	2	2	2	2	32	2	5	95	4	10	89	0	0	71	20	25	20	0	32	6.80292	10	2
2	72	155	62	25.8065	2	2	1	2	2	1	3	4	75	10	8	65	5	0	82	30	30	40	0	40	6.44143	13	2
2	54	164	67	24.9108	1	2	1	2	2	7	1	6	45	5	2	34	65	100	72	55	50	50	0	60	4.51651	12	2
1	60	165	79	29.0174	2	2	3	1	1	1	0	7	85	12	16	22	25	0	71	30	50	40	0	56	6.56368	11	2
2	54	155	56	23.3091	1	2	1	2	2	1	1	5	55	2	2	41	75	0	72	55	50	60	0	52	4.55744	9	2
2	70	158	56	22.4323	1	2	1	2	2	10	1	5	85	4	12	68	10	0	71	15	25	20	0	20	6.64355	13	2
1	91	165	70	25.7117	1	4	2	1	1	23	4	4	85	2	4	74	5	0	71	30	45	20	0	40	5.71883	12	2
2	68	150	55	24.4444	2	2	3	2	2	20	2	4	80	4	4	25	10	0	71	15	25	10	0	24	5.05321	14	2
2	62	163	51	19.1953	1	2	2	2	2	14	2	3	70	5	8	78	15	0	71	20	30	10	0	32	6.23971	16	2
2	77	150	46	20.4444	1	2	1	2	2	4	1	4	75	10	18	53	25	0	71	30	25	30	0	24	7.09052	11	2
2	68	165	70	25.7117	1	2	2	2	2	1	2	5	85	10	16	87	20	0	82	30	40	20	0	32	7.44157	13	2
2	68	140	50	25.5102	2	2	1	2	2	16	2	8	70	4	8	58	15	0	82	30	40	40	0	40	5.96623	9	2
2	72	153	49	20.9321	1	2	1	2	2	4	2	2	80	2	4	56	5	0	71	30	25	20	0	20	5.45373	16	2
2	71	146	45.5	21.3455	1	2	1	2	1	20	1	5	60	6	4	141	50	25	72	30	45	70	33.3333	52	6.10999	10	2
1	51	169	71.6	25.0692	2	2	2	1	1	30	1	5	30	5	4	24	55	50	72	45	55	30	0	52	4.39074	10	2
2	50	150	46.4	20.6222	2	2	1	2	2	5	0	6	40	0	4	33	35	0	72	35	35	80	33.3333	40	4.12756	8	2
2	59	150	50	22.2222	1	2	1	2	2	10	1	6	30	0	0	23	65	0	84	47	65	60	33.3333	40	2.61485	10	2
2	79	165	45	16.5289	1	2	1	2	2	20	3	7	95	10	18	10	0	0	71	70	25	0	0	20	6.20313	15	2
1	69	170	51	17.6471	1	2	2	1	1	20	0	10	85	20	20	35	0	0	62	5	5	0	0	12	7.43534	14	2
2	41	160	45	17.5781	2	2	3	2	2	10	0	7	25	0	2	138	85	50	84	20	50	20	0	40	4.59104	17	2
1	53	178	66.5	20.9885	1	2	2	1	1	1	0	7	35	4	4	92	25	0	71	45	50	60	100	56	5.33525	11	2
2	71	160	53	20.7031	1	2	1	2	2	30	0	4	90	6	12	90	5	0	71	25	30	30	0	28	7.03562	11	2
2	36	162	70	26.6728	1	2	2	2	2	20	0	4	95	20	24	30	15	0	71	15	40	20	0	24	7.70646	15	2
2	70	161	48.5	18.7107	2	2	2	2	2	9	1	5	80	4	4	23	10	0	82	35	55	40	0	56	4.99485	8	2
2	52	153	52.6	22.47	1	2	2	2	2	30	1	5	10	0	0	88	65	50	84	40	60	50	66.6667	56	3.27414	9	2
1	58	160	45	17.5781	1	2	1	1	1	32	1	4	90	2	20	101	0	0	82	15	25	10	0	20	7.39096	17	2
2	63	157	62.5	25.356	1	2	2	2	2	22	0	7	85	12	28	27	50	0	84	50	50	60	0	36	7.43028	10	2
2	63	160	60	23.4375	1	2	3	2	2	10	0	9	15	0	2	45	15	0	94	35	75	80	0	80	3.66662	9	2
1	68	173	67.5	22.5534	1	2	1	2	2	6	1	4	45	2	4	56	25	0	72	45	70	80	0	68	4.96373	8	2
1	60	174	95	31.378	2	2	3	2	2	30	1	5	30	2	6	7	50	0	84	55	70	70	100	76	3.54983	9	2
2	71	145	39.5	18.7872	1	2	2	2	2	52	1	6	65	2	4	14	25	0	84	40	45	70	0	56	4.27332	8	2
1	57	165	99	36.3636	2	2	2	1	1	7	3	7	50	2	7	11	15	0	82	40	40	50	0	32	4.25613	10	2
1	77	165	55	20.202	1	2	2	1	1	1	1	8	50	0	7	103	40	0	72	50	30	70	0	40	5.42593	8	2
2	55	161	59	22.7615	1	2	2	2	2	16	0	7	50	5	5	61	45	25	84	50	35	60	33.3333	32	5.45591	9	2
2	80	150	64	28.4444	1	2	1	2	2	8	1	8	50	4	6	103	15	0	82	30	50	40	0	48	5.87602	12	2
2	52	158	48	19.2277	1	2	2	2	2	24	1	6	35	0	1	44	80	100	62	40	60	50	0	68	3.69893	16	2
2	63	158	73	29.2421	1	2	2	2	1	13	1	5	40	2	8	36	65	50	72	35	55	50	0	64	5.04836	14	2
2	71	150	65	28.8889	2	4	2	2	2	34	2	9	95	20	22	37	0	0	82	10	40	30	0	56	7.73647	11	2
2	50	152	48.4	20.9488	1	2	2	2	2	30	0	3	20	1	3	89	5	0	71	30	40	30	0	52	4.67199	16	2
2	69	152	50.8	21.9875	2	4	1	1	1	20	0	7	50	0	4	7	80	100	74	50	55	80	100	48	3.18214	11	2
2	61	146	50.2	23.5504	2	2	2	2	2	10	1	8	60	5	10	138	30	0	82	30	45	50	0	48	6.68605	8	2
2	54	175	79	25.7959	1	2	3	2	1	10	2	7	50	2	6	97	70	0	72	35	40	60	100	48	5.66999	9	2
2	53	155	50	20.8117	2	2	1	2	2	20	2	5	80	8	10	94	5	0	71	20	70	30	0	56	6.86314	13	2
2	73	158	57	22.8329	2	2	2	2	2	1	0	6	20	0	0	40	85	25	74	62	35	60	33.3333	28	2.86222	9	2
2	70	158	45.6	18.2663	1	4	2	1	2	1	1	4	70	2	2	116	75	50	74	40	55	40	66.6667	60	5.49545	12	2
2	64	154	42.4	17.8782	1	2	1	2	2	10	2	5	20	0	0	52	90	0	80	40	60	80	100	56	3.04587	12	2
1	69	160	66.9	26.1328	1	2	2	1	1	1	4	6	30	0	2	41	40	0	84	25	55	40	0	40	3.81146	10	2
1	73	162	46.4	17.6802	1	2	1	1	1	1	1	6	40	0	2	119	50	0	72	30	40	40	0	48	4.69735	10	2
2	64	155	55	22.8928	2	2	2	2	2	10	1	6	30	2	5	127	10	0	71	35	55	30	0	48	5.45911	11	2
2	44	165	52	19.1001	1	2	3	2	2	10	0	8	40	0	10	62	90	0	74	45	55	60	0	52	5.21987	9	2
1	52	175	66.5	21.7143	1	2	2	2	2	1	0	7	80	0	3	5	95	100	74	60	60	70	100	88	3.21655	10	2
2	73	158	40	16.0231	1	2	1	2	2	10	2	7	50	0	10	102	75	0	62	20	40	40	0	36	5.70836	17	2
1	54	165	60	22.0386	2	4	2	1	2	3	2	6	30	0	0	67	45	0	84	20	20	40	0	20	3.36328	17	2
2	60	151	51	22.3674	1	2	3	2	2	4	0	11	20	0	0	23	95	50	74	45	55	70	0	64	2.47485	8	2
2	88	152	41	17.7458	2	4	2	2	2	30	3	10	80	0	0	127	55	0	61	40	40	80	100	72	4.51093	14	2
